# Supplementary material
Source: publisher figshare collection journal article supplement (https://geolsoc.figshare.com/ndownloader/files/36235998)
Supplement: Supplementary file 1 [file 36235998]

## Sheet: 15JB45
15JB45
Analysis	Isotopic ratios						Dates (Ma)
	206Pb/238U		207Pb/235U		207Pb/206Pb		206Pb/238U		207Pb/235U
Standard name	Ratio	± 1SD	Ratio	± 1SD	Ratio	± 1SD	AGE (Ma)	± 2SD	AGE (Ma)	± 2SD
de15i05	0.0204	4.02%	0.1311	18.33%	0.04893	14.46%	130.3	10.4	125.1	43.2
de15j11	0.0206	0.0259	0.1361	0.0336	0.04928	0.0287	131.1	6.7	129.6	8.2
de15i07	0.0206	3.09%	0.1416	5.96%	0.04977	5.24%	131.3	8.0	134.5	15.0
de15i10	0.0206	2.48%	0.1353	6.53%	0.04784	5.64%	131.5	6.4	128.9	15.8
de15j13	0.0206	0.0269	0.1385	0.0484	0.04924	0.0419	131.6	7	131.7	12
de15k14	0.0206	2.49%	0.1421	2.85%	0.04985	3.15%	131.7	6.5	134.9	7.2
de15j08	0.0207	0.0277	0.1422	0.0454	0.05111	0.0281	132	7.2	135	11.5
de15i09	0.0207	1.97%	0.1317	8.05%	0.04584	8.71%	132	5.2	125.7	19.0
de15j14	0.0209	0.0227	0.1428	0.0623	0.0493	0.0496	133.1	6	135.5	15.8
de15k10	0.0210	2.45%	0.1400	8.49%	0.04781	8.82%	133.7	6.5	133.0	21.2
de15k05	0.0209	2.49%	0.1349	4.50%	0.04751	4.14%	133.5	6.6	128.5	10.8
de15k13	0.0213	3.00%	0.1507	8.60%	0.04975	9.99%	135.9	8.1	142.5	22.9

## Sheet: 15JB53
15JB53
Analysis	Isotopic ratios						Dates (Ma)
	206Pb/238U		207Pb/235U		207Pb/206Pb		206Pb/238U		207Pb/235U
Standard name	Ratio	± 1SD	Ratio	± 1SD	Ratio	± 1SD	AGE (Ma)	± 2SD	AGE (Ma)	± 2SD
de04h12	0.0159	2.59%	0.1060	7.37%	0.04915	7.95%	101.8	5.2	102.3	14.3
de04h08	0.0160	1.62%	0.1008	7.58%	0.04648	7.22%	102	3.3	97.5	14.1
de04g07	0.0161	1.04%	0.1046	4.14%	0.04760	3.82%	102.7	2.1	101.0	8.0
de04f05	0.0161	1.10%	0.1113	4.26%	0.05069	3.98%	103	2.2	107.1	8.7
de04g09	0.0161	2.10%	0.1050	7.98%	0.04885	8.03%	103.2	4.3	101.4	15.4
de04f09	0.0162	1.43%	0.1079	7.21%	0.04823	8.40%	103.4	2.9	104.0	14.3
de04h10	0.0162	1.04%	0.1067	3.18%	0.04886	3.05%	103.5	2.1	103.0	6.2
de04g10	0.0162	1.20%	0.1083	5.50%	0.04860	5.70%	103.9	2.5	104.4	10.9
de04g11	0.0163	1.73%	0.1097	6.38%	0.05026	6.43%	104	3.6	105.7	12.8
de04g12	0.0163	1.79%	0.1066	6.03%	0.04758	5.85%	104.3	3.7	102.9	11.8
de04f08	0.0163	1.47%	0.1053	6.87%	0.04637	7.03%	104.4	3.1	101.7	13.3
de04h14	0.0164	1.97%	0.1052	8.54%	0.04654	7.12%	104.7	4.1	101.6	16.5
de04g06	0.0164	1.55%	0.1146	8.13%	0.05138	7.88%	104.8	3.2	110.2	17.0
de04f14	0.0166	2.55%	0.1075	7.35%	0.04604	6.88%	105.9	5.4	103.7	14.5

## Sheet: PRR-6061
PRR-6061
Analysis	Isotopic ratios						Dates (Ma)
	206Pb/238U		207Pb/235U		207Pb/206Pb		206Pb/238U		207Pb/235U
Standard name	Ratio	± 1SD	Ratio	± 1SD	Ratio	± 1SD	AGE (Ma)	± 2SD	AGE (Ma)	± 2SD
de15b05	0.0171	3.63%	0.1120	5.31%	0.04757	5.02%	109.3	7.9	107.8	10.9
de15a12	0.0171	3.32%	0.1169	5.11%	0.04985	5.47%	109.4	7.2	112.3	10.9
de15b11	0.0172	2.91%	0.1222	3.83%	0.04956	3.73%	110.2	6.3	117.1	8.5
de15a05	0.0172	2.46%	0.1203	3.86%	0.05015	3.86%	110.2	5.4	115.4	8.4
de15b09	0.0173	2.59%	0.1128	3.77%	0.04652	3.90%	110.4	5.7	108.6	7.8
de15b06	0.0174	4.16%	0.1177	5.79%	0.05125	3.65%	111.0	9.1	113	12.4
de15b08	0.0174	2.22%	0.1171	2.87%	0.04976	2.72%	111.1	4.9	112.5	6.1
de15a11	0.0175	2.89%	0.1263	4.41%	0.05201	3.79%	111.6	6.4	120.8	10.0
de15b12	0.0175	1.89%	0.1141	4.78%	0.04750	4.59%	111.8	4.2	109.7	9.9
de15b07	0.0176	3.32%	0.1153	4.49%	0.04780	4.38%	112.3	7.4	110.8	9.4
de15b14	0.0177	1.25%	0.1160	5.86%	0.04700	6.06%	113.2	2.8	111.4	12.4
de15a09	0.0177	3.96%	0.1247	4.86%	0.05145	4.18%	113.4	8.9	119.3	10.9
de15a10	0.0178	4.05%	0.1236	4.08%	0.05071	3.12%	114.0	9.2	118.3	9.1
de15a13	0.0179	2.57%	0.1229	4.25%	0.05047	4.14%	114.1	5.8	117.7	9.5
de15b10	0.0180	2.94%	0.1209	4.52%	0.05135	3.81%	115.0	6.7	115.9	9.9
de15a08	0.0183	3.20%	0.1273	6.08%	0.05162	5.66%	116.6	7.4	121.6	13.9

## Sheet: PRR-6031
PRR-6031
Analysis	Isotopic ratios						Dates (Ma)
	206Pb/238U		207Pb/235U		207Pb/206Pb		206Pb/238U		207Pb/235U
Standard name	Ratio	± 1SD	Ratio	± 1SD	Ratio	± 1SD	AGE (Ma)	± 2SD	AGE (Ma)	± 2SD
de15d07	0.0173	1.30%	0.1225	5.55%	0.05196	5.56%	110.8	2.9	117.4	12.3
de15d10	0.0174	1.31%	0.1270	6.21%	0.05183	5.86%	111.2	2.9	121.4	14.2
de15d14	0.0174	1.82%	0.1188	6.00%	0.04942	5.40%	111.4	4.0	114.0	12.9
de15d09	0.0175	0.97%	0.1158	4.43%	0.04804	4.38%	112	2.2	111.2	9.3
de15d08	0.0175	1.37%	0.1145	5.68%	0.04835	4.90%	112	3.0	110.1	11.9
de15d05	0.0175	1.06%	0.1229	5.16%	0.05264	4.86%	112.1	2.4	117.7	11.5
de15d12	0.0176	1.74%	0.1130	3.39%	0.04711	3.16%	112.2	3.9	108.7	7.0
de15e10	0.0176	1.02%	0.1228	3.90%	0.05125	3.71%	112.6	2.3	117.6	8.7
de15d13	0.0176	1.83%	0.1137	5.61%	0.04659	6.06%	112.8	4.1	109.3	11.6
de15e08	0.0177	1.53%	0.1085	7.49%	0.04537	7.37%	112.9	3.4	104.6	14.9
de15d11	0.0177	1.03%	0.1196	3.05%	0.04863	3.16%	113.3	2.3	114.7	6.6
de15e12	0.0178	1.21%	0.1215	4.24%	0.04947	4.23%	113.9	2.7	116.4	9.3

## Sheet: PRR-6000
PRR-6000
Analysis	Isotopic ratios						Dates (Ma)
	206Pb/238U		207Pb/235U		207Pb/206Pb		206Pb/238U		207Pb/235U
Standard name	Ratio	± 1SD	Ratio	± 1SD	Ratio	± 1SD	AGE (Ma)	± 2SD	AGE (Ma)	± 2SD
de14l11	0.0160	2.73%	0.1120	4.18%	0.05133	3.57%	102.3	5.5	107.8	8.5
de14j07	0.0163	2.53%	0.1027	4.74%	0.04646	5.03%	104.2	5.2	99.2	9.0
de14k14	0.0164	1.68%	0.1048	5.49%	0.04530	5.23%	104.6	3.5	101.2	10.6
std-4	0.0164	1.68%	0.1046	5.49%	0.04527	5.23%	104.7	3.5	101.1	10.6
de14l10	0.0165	1.65%	0.1131	3.43%	0.04984	3.29%	105.5	3.5	108.8	7.1
de14k08	0.0166	1.72%	0.1146	6.46%	0.05080	5.44%	106.2	3.6	110.2	13.5
de14k05	0.0168	1.49%	0.1179	4.34%	0.04941	4.59%	107.1	3.2	113.1	9.3
de14j10	0.0168	2.20%	0.1080	4.93%	0.04822	4.84%	107.2	4.7	104.1	9.8
de14j08	0.0168	2.16%	0.1223	14.32%	0.05453	8.45%	107.6	4.6	117.1	31.7
de14k09	0.0169	1.69%	0.1239	5.19%	0.05370	4.91%	107.9	3.6	118.6	11.6
de14j05	0.0169	1.49%	0.1187	4.34%	0.05004	4.59%	108.2	3.2	113.9	9.4
de14k12	0.0174	3.30%	0.1172	7.27%	0.04880	5.96%	111	7.3	112.5	15.5

## Sheet: PRR-24285
PRR-24285
Analysis	Isotopic ratios						Dates (Ma)
	206Pb/238U		207Pb/235U		207Pb/206Pb		206Pb/238U		207Pb/235U
Standard name	Ratio	± 1SD	Ratio	± 1SD	Ratio	± 1SD	AGE (Ma)	± 2SD	AGE (Ma)	± 2SD
de16g08	0.0209	1.68%	0.1388	6.05%	0.04733	6.88%	133.6	4.5	132.0	15.0
de16h09	0.0209	2.02%	0.1414	6.94%	0.04814	7.11%	133.6	5.4	134.3	17.4
de16f08	0.0210	1.95%	0.1390	6.45%	0.04563	6.66%	134	5.2	132.1	16.0
de16f05	0.0210	1.65%	0.1496	4.73%	0.05194	4.72%	134.1	4.4	141.6	12.5
de16g12	0.0210	2.71%	0.1480	4.26%	0.05082	3.04%	134.2	7.2	140.1	11.2
de16g10	0.0212	1.82%	0.1504	4.63%	0.05139	4.52%	135.3	4.9	142.3	12.3
de16h11	0.0214	2.30%	0.1543	5.15%	0.05242	5.31%	136.2	6.2	145.7	14.0
de16f11	0.0214	1.89%	0.1547	4.78%	0.05253	4.96%	136.7	5.1	146.1	13.0
de16g09	0.0215	1.86%	0.1353	7.90%	0.04700	7.16%	137.3	5.1	128.9	19.1
de16f12	0.0215	2.77%	0.1394	8.39%	0.04620	6.52%	137.3	7.5	132.5	20.9
de16f06	0.0215	2.01%	0.1430	6.66%	0.04769	6.33%	137.4	5.5	135.7	16.9
de16h10	0.0216	2.15%	0.1604	5.86%	0.05140	5.04%	137.9	5.9	151.0	16.5
de16g13	0.0217	1.81%	0.1482	4.97%	0.04905	4.74%	138.6	5.0	140.3	13.0
de16f07	0.0218	1.20%	0.1451	4.79%	0.04808	4.35%	139	3.3	137.6	12.3
de16h07	0.0218	2.09%	0.1444	8.07%	0.04756	7.04%	139	5.8	136.9	20.7
de16f13	0.0219	2.11%	0.1483	2.79%	0.04971	2.53%	139.4	5.8	140.4	7.3
de16g05	0.0219	1.89%	0.1417	6.09%	0.04707	5.79%	139.7	5.2	134.5	15.4
de16f14	0.0219	1.85%	0.1469	2.63%	0.05072	2.41%	139.9	5.1	139.1	6.9
de16f09	0.0220	1.40%	0.1387	2.45%	0.04780	1.87%	140.4	3.9	131.9	6.1
de16g11	0.0221	2.91%	0.1579	4.58%	0.05108	4.24%	140.8	8.1	148.9	12.7
de16g07	0.0222	2.78%	0.1482	5.33%	0.04741	4.74%	141.7	7.8	140.3	14.0

## Sheet: PRR-24201
PRR-24201
Analysis	Isotopic ratios						Dates (Ma)
	206Pb/238U		207Pb/235U		207Pb/206Pb		206Pb/238U		207Pb/235U
Standard name	Ratio	± 1SD	Ratio	± 1SD	Ratio	± 1SD	AGE (Ma)	± 2SD	AGE (Ma)	± 2SD
de15m13	0.0212	0.94%	0.1430	3.09%	0.04914	3.47%	135	2.5	135.7	7.8
de15m05	0.0212	0.96%	0.1398	3.77%	0.04812	3.64%	135.3	2.6	132.8	9.4
de16a05	0.0212	1.08%	0.1525	3.76%	0.05317	3.53%	135.3	2.9	144.1	10.1
de15l12	0.0212	1.51%	0.1583	7.29%	0.05370	7.59%	135.5	4.0	149.2	20.2
de16a09	0.0213	0.91%	0.1552	4.13%	0.05362	4.27%	135.6	2.4	146.5	11.3
de16a07	0.0213	0.72%	0.1479	2.91%	0.05095	2.89%	135.8	1.9	140.1	7.6
de16a12	0.0214	0.74%	0.1377	2.65%	0.04776	2.59%	136.2	2.0	131.0	6.5
de15l06	0.0214	1.57%	0.1519	6.75%	0.05022	6.93%	136.3	4.2	143.5	18.1
de16a14	0.0214	1.28%	0.1554	5.62%	0.05395	5.15%	136.4	3.4	146.7	15.3
de16a10	0.0214	0.93%	0.1432	2.67%	0.04900	2.84%	136.5	2.5	135.9	6.8
de15l08	0.0214	1.27%	0.1401	5.28%	0.04742	5.50%	136.5	3.4	133.1	13.2
de16a08	0.0216	0.69%	0.1374	2.83%	0.04830	2.67%	137.8	1.9	130.8	6.9
de16a06	0.0216	0.61%	0.1491	2.19%	0.05075	2.07%	138	1.7	141.2	5.8
de15l14	0.0216	0.63%	0.1472	2.53%	0.05031	2.37%	138	1.7	139.4	6.6
de15l09	0.0217	0.65%	0.1484	3.01%	0.05009	3.07%	138.1	1.8	140.5	7.9
de15m09	0.0217	1.62%	0.1460	6.76%	0.04986	6.70%	138.1	4.4	138.4	17.5
de15m07	0.0217	0.68%	0.1412	1.59%	0.04907	1.60%	138.2	1.9	134.1	4.0
de15m14	0.0217	1.54%	0.1475	6.45%	0.05000	6.04%	138.3	4.2	139.7	16.8
de16a13	0.0217	1.22%	0.1468	5.16%	0.04846	5.05%	138.5	3.3	139.1	13.4
de15m06	0.0218	0.69%	0.1586	3.04%	0.05293	2.99%	139.2	1.9	149.5	8.5
de15l10	0.0219	1.51%	0.1431	7.21%	0.04875	7.15%	139.6	4.2	135.8	18.3

## Sheet: PRR-5990
PRR-5990
Analysis	Isotopic ratios						Dates (Ma)
	206Pb/238U		207Pb/235U		207Pb/206Pb		206Pb/238U		207Pb/235U
Standard name	Ratio	± 1SD	Ratio	± 1SD	Ratio	± 1SD	AGE (Ma)	± 2SD	AGE (Ma)	± 2SD
se26f07	0.0183	1.08%	0.1276	4.92%	0.04931	4.92%	117.2	2.5	122.0	11.3
se26e12	0.0184	0.88%	0.1287	4.58%	0.05003	4.34%	117.6	2.0	123.0	10.6
se26f05	0.0185	0.72%	0.1308	1.81%	0.05266	1.85%	118.2	1.7	124.9	4.2
se26d09	0.0185	0.82%	0.1248	5.05%	0.04957	4.82%	118.2	1.9	119.4	11.4
se26d12	0.0186	0.95%	0.1143	4.79%	0.04458	4.26%	118.6	2.2	109.8	10.0
se26d05	0.0186	0.58%	0.1202	1.14%	0.04869	1.04%	118.7	1.4	115.3	2.5
se26e08	0.0186	1.18%	0.1342	2.74%	0.05304	2.39%	118.9	2.8	127.8	6.6
se26e14	0.0186	0.79%	0.1242	3.68%	0.04863	3.59%	119.1	1.9	118.9	8.3
se26f14	0.0187	0.59%	0.1223	2.17%	0.04755	2.11%	119.2	1.4	117.1	4.8
se26f12	0.0188	0.48%	0.1244	1.76%	0.04876	1.72%	119.8	1.1	119.0	4.0
se26d08	0.0188	0.70%	0.1217	2.25%	0.04792	2.20%	119.8	1.7	116.6	5.0
se26d13	0.0188	0.91%	0.1320	5.59%	0.05093	4.64%	119.8	2.2	125.9	13.2

## Sheet: PRR-5991
PRR-5991
Analysis	Isotopic ratios						Dates (Ma)
	206Pb/238U		207Pb/235U		207Pb/206Pb		206Pb/238U		207Pb/235U
Standard name	Ratio	± 1SD	Ratio	± 1SD	Ratio	± 1SD	AGE (Ma)	± 2SD	AGE (Ma)	± 2SD
se26i12	0.0177	0.0101	0.12	0.0199	0.05108	0.0181	113	2.3	115.1	4.3
se26h12	0.0183	0.0197	0.1258	0.0416	0.04958	0.0337	116.6	4.5	120.3	9.4
se26h08	0.0183	0.009	0.1302	0.0333	0.0513	0.0321	116.7	2.1	124.3	7.8
se26h05	0.0183	0.0161	0.1236	0.0312	0.04825	0.027	117.1	3.7	118.4	7
se26i06	0.0185	0.015	0.1201	0.0433	0.0467	0.0436	117.9	3.5	115.1	9.4
se26g07	0.0186	0.009	0.1343	0.0463	0.05143	0.0468	118.8	2.1	127.9	11.1
se26i13	0.0186	0.0056	0.1239	0.0255	0.04898	0.0231	119	1.3	118.6	5.7
se26i09	0.0186	0.0146	0.1198	0.0273	0.04873	0.025	119	3.5	114.9	5.9
se26h10	0.0187	0.0118	0.1134	0.0549	0.04265	0.0473	119.7	2.8	109.1	11.4
se26g06	0.0188	0.0049	0.1252	0.0241	0.04855	0.0233	119.8	1.2	119.8	5.4
se26g10	0.0187	0.0177	0.1311	0.0434	0.05016	0.0405	119.5	4.2	125.1	10.2
se26g12	0.0188	0.0218	0.1288	0.037	0.04957	0.0358	120	5.2	123	8.6
se26h13	0.0188	0.0187	0.1194	0.0399	0.04652	0.0366	120.1	4.5	114.5	8.6
se26i05	0.0188	0.0237	0.1282	0.0307	0.0504	0.0299	120.1	5.6	122.5	7.1
se26h14	0.0189	0.0288	0.1203	0.0338	0.04696	0.034	120.8	6.9	115.3	7.4
se26g13	0.0192	0.0239	0.1258	0.0365	0.04768	0.0315	122.5	5.8	120.4	8.3
se26h09	0.0193	0.0075	0.1274	0.0447	0.04881	0.0392	123	1.8	121.7	10.3
se26i07	0.0193	0.0196	0.1339	0.0251	0.05139	0.0205	123	4.8	127.6	6
se26i10	0.0194	0.0249	0.1309	0.0298	0.05026	0.025	123.8	6.1	124.9	7

## Sheet: PRR-6034
PRR-6034
Analysis	Isotopic ratios						Dates (Ma)
	206Pb/238U		207Pb/235U		207Pb/206Pb		206Pb/238U		207Pb/235U
Standard name	Ratio	± 1SD	Ratio	± 1SD	Ratio	± 1SD	AGE (Ma)	± 2SD	AGE (Ma)	± 2SD
no16b07	0.0126	1.46%	0.0911	8.03%	0.05143	7.83%	80.8	2.3	88.5	13.6
no16b05	0.0126	1.79%	0.0880	8.05%	0.04995	8.17%	80.9	2.9	85.7	13.2
no16a14	0.0126	1.32%	0.0870	6.69%	0.04885	6.18%	81	2.1	84.7	10.9
no16a06	0.0127	1.41%	0.0897	6.33%	0.05044	6.45%	81.1	2.3	87.2	10.6
no16c08	0.0127	1.48%	0.0832	5.88%	0.04856	5.78%	81.2	2.4	81.1	9.2
no16c13	0.0127	1.30%	0.0852	5.40%	0.04758	5.18%	81.4	2.1	83.0	8.6
no16c09	0.0127	1.47%	0.0889	5.74%	0.04990	6.37%	81.4	2.4	86.5	9.5
no16a05	0.0128	1.55%	0.0890	6.34%	0.05036	6.09%	81.7	2.5	86.6	10.5
no16a08	0.0128	2.11%	0.0895	9.78%	0.04989	8.59%	81.7	3.4	87.0	16.3
no16c11	0.0128	1.43%	0.0869	5.89%	0.04903	5.54%	81.9	2.3	84.6	9.6
no16c07	0.0128	1.97%	0.0940	7.17%	0.05304	7.03%	82.1	3.2	91.2	12.5
no16c10	0.0128	1.00%	0.0901	4.90%	0.05095	4.61%	82.3	1.6	87.6	8.2
no16a11	0.0129	1.22%	0.0861	4.63%	0.04817	5.11%	82.3	2	83.9	7.5
no16a07	0.0129	1.27%	0.0866	6.70%	0.04778	6.39%	82.7	2.1	84.3	10.8
no16a09	0.0130	1.37%	0.0844	7.23%	0.04724	7.49%	83	2.3	82.3	11.4
no16b12	0.0130	2.24%	0.0833	9.90%	0.04664	11.39%	83	3.7	81.3	15.5
no16c12	0.0130	2.28%	0.0878	11.03%	0.04877	10.83%	83.2	3.8	85.4	18.1
no16b14	0.0130	2.64%	0.0844	10.59%	0.04488	12.29%	83.3	4.4	82.3	16.7
no16c05	0.0131	2.10%	0.0863	10.80%	0.04696	10.51%	83.6	3.5	84.1	17.4
no16a10	0.0132	1.55%	0.0940	7.31%	0.05131	7.18%	84.5	2.6	91.3	12.8
no16a12	0.0132	2.77%	0.0963	16.88%	0.05063	20.68%	84.6	4.7	93.4	30.1
no16c14	0.0132	2.19%	0.0852	7.05%	0.04662	7.23%	84.7	3.7	83.0	11.2
no16b13	0.0132	2.15%	0.0824	10.29%	0.04380	10.72%	84.8	3.6	80.4	15.9
no16b10	0.0134	2.47%	0.0793	15.93%	0.04256	12.83%	85.7	4.2	77.5	23.8

[truncated: 25 more sheets: PRR-5994, PRR-5992, PRR-5998, PRR-5999, PRR-5985, PRR-32819, PRR-6023, PRR-6025, PRR-24226, N11.8.1, N11.142.1, J6.307.1, J6.290.1, J6.386.1, N11.12.1, N11.15.1, R.5939.2, R.5979.1, R.5793.2, R.5905.4 …]
